# Supplementary material for: New Insights in the Era of Clinical Biomarkers as Potential Predictors of Systemic Therapy-Induced Cardiotoxicity in Women with Breast Cancer: A Systematic Review
Source: MDPI journal article supplement (doi:10.3390/cancers15133290), 2023-06-22
Supplement: s1 [file s1]

**Table S1. Studies identified for the traditional biomarkers.**

|                         |                                                                                                                                                                                                                                                                                                                                                                                                                                                                                                                                                                                                                                                                                                                                                                                                                                                                                                                                                                                                                                                                                                                                                                                                                                                                                                                                                                                                                                                                                                      |                   |                                                                                                                                                                                                                                                                                                                                                                                                                                                                                                                                                                                                                                                                                                                                                                                                                                                                                                                                                                                                                                                                                                                                                                                                                                                                                                                                                                                                                                                                                                                                                                                                                                                                                                                                                                                                        |
|-------------------------|------------------------------------------------------------------------------------------------------------------------------------------------------------------------------------------------------------------------------------------------------------------------------------------------------------------------------------------------------------------------------------------------------------------------------------------------------------------------------------------------------------------------------------------------------------------------------------------------------------------------------------------------------------------------------------------------------------------------------------------------------------------------------------------------------------------------------------------------------------------------------------------------------------------------------------------------------------------------------------------------------------------------------------------------------------------------------------------------------------------------------------------------------------------------------------------------------------------------------------------------------------------------------------------------------------------------------------------------------------------------------------------------------------------------------------------------------------------------------------------------------|-------------------|--------------------------------------------------------------------------------------------------------------------------------------------------------------------------------------------------------------------------------------------------------------------------------------------------------------------------------------------------------------------------------------------------------------------------------------------------------------------------------------------------------------------------------------------------------------------------------------------------------------------------------------------------------------------------------------------------------------------------------------------------------------------------------------------------------------------------------------------------------------------------------------------------------------------------------------------------------------------------------------------------------------------------------------------------------------------------------------------------------------------------------------------------------------------------------------------------------------------------------------------------------------------------------------------------------------------------------------------------------------------------------------------------------------------------------------------------------------------------------------------------------------------------------------------------------------------------------------------------------------------------------------------------------------------------------------------------------------------------------------------------------------------------------------------------------|
| <p><b>Troponins</b></p> | <p><b>References</b></p> <p>Shafi <i>et al.</i>, 2017 [84]<br/> Zardavas <i>et al.</i>, 2017 [10]<br/> Blaes <i>et al.</i>, 2015 [85]<br/> Díaz-Antón <i>et al.</i>, 2022 [86]<br/> Howden <i>et al.</i>, 2021 [87]<br/> Pillai <i>et al.</i>, 2022 [89]<br/> Bisoc <i>et al.</i>, 2020 [90]<br/> Goel <i>et al.</i>, 2019 [91]<br/> Gulati <i>et al.</i>, 2017 [92]<br/> Gullo <i>et al.</i>, 2019 [93]<br/> Kirkham <i>et al.</i>, 2021 [94]<br/> Lakhani <i>et al.</i>, 2021 [95]<br/> Malik <i>et al.</i>, 2016 [96]<br/> Ponde <i>et al.</i>, 2018 [97]<br/> Putt <i>et al.</i>, 2015 [98]<br/> Rüger <i>et al.</i>, 2020 [99]<br/> De Sanctis <i>et al.</i>, 2021 [100]<br/> De Vries Schultink <i>et al.</i>, 2018 [101]<br/> Silva <i>et al.</i>, 2017 [102]<br/> Simões <i>et al.</i>, 2021 [103]<br/> Ürün <i>et al.</i>, 2015 [104]<br/> Ky <i>et al.</i>, 2014 [105]<br/> Anber <i>et al.</i>, 2019 [106]<br/> Dhesy-Thind <i>et al.</i>, 2019 [107]<br/> Dovganych <i>et al.</i>, 2022 [108]<br/> Finke <i>et al.</i>, 2021 [109]<br/> Florido <i>et al.</i>, 2019 [110]<br/> Henriksen <i>et al.</i>, 2022 [111]<br/> Hidayat <i>et al.</i>, 2020 [112]<br/> Hinrichs <i>et al.</i>, 2020 [113]<br/> Isemede <i>et al.</i>, 2022 [114]<br/> Jones <i>et al.</i>, 2017 [115]<br/> Mokuyasu <i>et al.</i>, 2015 [116]<br/> Tzolos <i>et al.</i>, 2020 [83]<br/> Rosenkaimer <i>et al.</i>, 2022 [117]<br/> Posch <i>et al.</i>, 2022 [118]<br/> Ben Kridis <i>et al.</i>, 2020 [119]</p> | <p><b>NPs</b></p> | <p><b>References</b></p> <p>Andersson <i>et al.</i>, 2021 [122]<br/> Blancas <i>et al.</i>, 2020 [123]<br/> Bouwer <i>et al.</i>, 2019 [124]<br/> Alves <i>et al.</i>, 2022 [125]<br/> Matos <i>et al.</i>, 2016 [126]<br/> Lu <i>et al.</i>, 2019 [127]<br/> Bisoc <i>et al.</i>, 2020 [90]<br/> Díaz-Antón <i>et al.</i>, 2022 [86]<br/> Ky <i>et al.</i>, 2014 [105]<br/> De Iuliis <i>et al.</i>, 2015 [129]<br/> Demissei <i>et al.</i>, 2020 [130]<br/> Demissei <i>et al.</i>, 2019 [131]<br/> Dong <i>et al.</i>, 2022 [132]<br/> El-Sherbeny <i>et al.</i>, 2019 [133]<br/> Goel <i>et al.</i>, 2019 [91]<br/> Grela-Wojewoda <i>et al.</i>, 2022 [134]<br/> Gulati <i>et al.</i>, 2017 [92]<br/> Howden <i>et al.</i>, 2021 [87]<br/> Liang <i>et al.</i>, 2016 [135]<br/> Malik <i>et al.</i>, 2016 [96]<br/> Patel <i>et al.</i>, 2021 [136]<br/> Ponde <i>et al.</i>, 2018 [97]<br/> Putt <i>et al.</i>, 2015 [98]<br/> Rüger <i>et al.</i>, 2020 [99]<br/> De Sanctis <i>et al.</i>, 2021 [100]<br/> De Vries Schultink <i>et al.</i>, 2018 [101]<br/> Simões <i>et al.</i>, 2021 [103]<br/> Skovgaard <i>et al.</i>, 2014 [137]<br/> Anber <i>et al.</i>, 2019 [106]<br/> Caram <i>et al.</i>, 2015 [138]<br/> Dores <i>et al.</i>, 2013 [139]<br/> Finke <i>et al.</i>, 2021 [109]<br/> Hinrichs <i>et al.</i>, 2020 [113]<br/> Isemede <i>et al.</i>, 2022 [114]<br/> Kittiwarawut <i>et al.</i>, 2013 [140]<br/> Kouloubinis <i>et al.</i>, 2015 [128]<br/> Rosenkaimer <i>et al.</i>, 2022 [117]<br/> Ben Kridis <i>et al.</i>, 2020 [119]<br/> Özbay <i>et al.</i>, 2022 [141]<br/> Dhir <i>et al.</i>, 2019 [142]<br/> Esmaeilzadeh <i>et al.</i>, 2022 [143]<br/> Feng <i>et al.</i>, 2021 [144]<br/> Posch <i>et al.</i>, 2022 [118]<br/> Gherghe <i>et al.</i>, 2022 [145]</p> |
|-------------------------|------------------------------------------------------------------------------------------------------------------------------------------------------------------------------------------------------------------------------------------------------------------------------------------------------------------------------------------------------------------------------------------------------------------------------------------------------------------------------------------------------------------------------------------------------------------------------------------------------------------------------------------------------------------------------------------------------------------------------------------------------------------------------------------------------------------------------------------------------------------------------------------------------------------------------------------------------------------------------------------------------------------------------------------------------------------------------------------------------------------------------------------------------------------------------------------------------------------------------------------------------------------------------------------------------------------------------------------------------------------------------------------------------------------------------------------------------------------------------------------------------|-------------------|--------------------------------------------------------------------------------------------------------------------------------------------------------------------------------------------------------------------------------------------------------------------------------------------------------------------------------------------------------------------------------------------------------------------------------------------------------------------------------------------------------------------------------------------------------------------------------------------------------------------------------------------------------------------------------------------------------------------------------------------------------------------------------------------------------------------------------------------------------------------------------------------------------------------------------------------------------------------------------------------------------------------------------------------------------------------------------------------------------------------------------------------------------------------------------------------------------------------------------------------------------------------------------------------------------------------------------------------------------------------------------------------------------------------------------------------------------------------------------------------------------------------------------------------------------------------------------------------------------------------------------------------------------------------------------------------------------------------------------------------------------------------------------------------------------|

|      |                                                                                                                                                                                                                                                                                                                                                                                                                                                                                                                                                                                                                                                                                                                                                                                                                                                                                                                                                                                                                                                                                                                                                                                                                                                                                                                                                                                                                                                                                                                                                                                                                                                                                                                                                                                                                                                                                                                                                                                                                                                |
|------|------------------------------------------------------------------------------------------------------------------------------------------------------------------------------------------------------------------------------------------------------------------------------------------------------------------------------------------------------------------------------------------------------------------------------------------------------------------------------------------------------------------------------------------------------------------------------------------------------------------------------------------------------------------------------------------------------------------------------------------------------------------------------------------------------------------------------------------------------------------------------------------------------------------------------------------------------------------------------------------------------------------------------------------------------------------------------------------------------------------------------------------------------------------------------------------------------------------------------------------------------------------------------------------------------------------------------------------------------------------------------------------------------------------------------------------------------------------------------------------------------------------------------------------------------------------------------------------------------------------------------------------------------------------------------------------------------------------------------------------------------------------------------------------------------------------------------------------------------------------------------------------------------------------------------------------------------------------------------------------------------------------------------------------------|
| LVEF | <p><b>References</b></p> <p>Stoodley <i>et al.</i>, 2013 [146]<br/> Stoodley <i>et al.</i>, 2013 [147]<br/> Suerken <i>et al.</i>, 2015 [148]<br/> Bulten <i>et al.</i>, 2015 [149]<br/> Bulten <i>et al.</i>, 2014 [159]<br/> Tahir <i>et al.</i>, 2022 [150]<br/> Wang <i>et al.</i>, 2020 [151]<br/> Tromp <i>et al.</i>, 2020 [153]<br/> El-Sherbeny <i>et al.</i>, 2019 [133]<br/> Goel <i>et al.</i>, 2019 [91]<br/> Huang <i>et al.</i>, 2018 [171]<br/> Huang <i>et al.</i>, 2022 [160]<br/> Huang <i>et al.</i>, 2017 [161]<br/> Rüger <i>et al.</i>, 2020 [99]<br/> Skovgaard <i>et al.</i>, 2014 [137]<br/> Todorova <i>et al.</i>, 2020 [163]<br/> Lakhani <i>et al.</i>, 2021 [95]<br/> Coutinho Cruz <i>et al.</i>, 2020 [164]<br/> Dang <i>et al.</i>, 2016 [165]<br/> Demissei <i>et al.</i>, 2019 [131]<br/> Demissei <i>et al.</i>, 2020 [130]<br/> Dong <i>et al.</i>, 2022 [132]<br/> Dores <i>et al.</i>, 2013 [139]<br/> Dovganych <i>et al.</i>, 2022 [108]<br/> Ferreira <i>et al.</i>, 2022 [168]<br/> Finke <i>et al.</i>, 2021 [109]<br/> Gavila <i>et al.</i>, 2017 [169]<br/> Hinrichs <i>et al.</i>, 2020 [113]<br/> Honda <i>et al.</i>, 2017 [170]<br/> Jordan <i>et al.</i>, 2014 [172]<br/> Kibudde <i>et al.</i>, 2019 [173]<br/> Kim <i>et al.</i>, 2019 [174]<br/> Liu <i>et al.</i>, 2023 [175]<br/> Lorenzini <i>et al.</i>, 2017 [176]<br/> Mescher <i>et al.</i>, 2017 [177]<br/> Shafi <i>et al.</i>, 2017 [84]<br/> Sun <i>et al.</i>, 2016 [178]<br/> Yamashita <i>et al.</i>, 2021 [179]<br/> Abdallah <i>et al.</i>, 2020 [180]<br/> Altaha <i>et al.</i>, 2020 [181]<br/> Arciniegas Calle <i>et al.</i>, 2018 [182]<br/> Ben Kridis <i>et al.</i>, 2020 [119]<br/> Calvillo-Argüelles <i>et al.</i>, 2022 [183]<br/> Chang <i>et al.</i>, 2020 [185]<br/> Chang <i>et al.</i>, 2016 [184]<br/> Chen <i>et al.</i>, 2019 [220]<br/> Choe <i>et al.</i>, 2018 [186]<br/> De Barros <i>et al.</i>, 2019 [187]<br/> De Souza <i>et al.</i>, 2021 [188]<br/> Demissei <i>et al.</i>, 2021 [166]</p> |
|------|------------------------------------------------------------------------------------------------------------------------------------------------------------------------------------------------------------------------------------------------------------------------------------------------------------------------------------------------------------------------------------------------------------------------------------------------------------------------------------------------------------------------------------------------------------------------------------------------------------------------------------------------------------------------------------------------------------------------------------------------------------------------------------------------------------------------------------------------------------------------------------------------------------------------------------------------------------------------------------------------------------------------------------------------------------------------------------------------------------------------------------------------------------------------------------------------------------------------------------------------------------------------------------------------------------------------------------------------------------------------------------------------------------------------------------------------------------------------------------------------------------------------------------------------------------------------------------------------------------------------------------------------------------------------------------------------------------------------------------------------------------------------------------------------------------------------------------------------------------------------------------------------------------------------------------------------------------------------------------------------------------------------------------------------|

|      |                                              |
|------|----------------------------------------------|
| LVEF | Dhir <i>et al.</i> , 2019 [142]              |
|      | Ferreira De Souza <i>et al.</i> , 2018 [167] |
|      | Florescu <i>et al.</i> , 2014 [158]          |
|      | Gong <i>et al.</i> , 2019 [189]              |
|      | Gripp <i>et al.</i> , 2018 [190]             |
|      | Guan <i>et al.</i> , 2021 [191]              |
|      | Guerra <i>et al.</i> , 2016 [192]            |
|      | Hochstadt <i>et al.</i> , 2020 [193]         |
|      | Hochstadt <i>et al.</i> , 2021 [194]         |
|      | Jones <i>et al.</i> , 2022 [195]             |
|      | Kirkham <i>et al.</i> , 2021 [94]            |
|      | Monti <i>et al.</i> , 2020 [196]             |
|      | Nakano <i>et al.</i> , 2016 [197]            |
|      | Narayan <i>et al.</i> , 2017 [198]           |
|      | Negishi <i>et al.</i> , 2013 [200]           |
|      | Negishi <i>et al.</i> , 2018 [201]           |
|      | Ong <i>et al.</i> , 2018 [202]               |
|      | Özbay <i>et al.</i> , 2022 [141]             |
|      | Park <i>et al.</i> , 2020 [203]              |
|      | Perone <i>et al.</i> , 2022 [204]            |
|      | Piotrowski <i>et al.</i> , 2013 [205]        |
|      | Posch <i>et al.</i> , 2022 [118]             |
|      | Reuvekamp <i>et al.</i> , 2016 [206]         |
|      | Rushton <i>et al.</i> , 2017 [207]           |
|      | Sato <i>et al.</i> , 2019 [208]              |
|      | Seferina <i>et al.</i> , 2016 [209]          |
|      | Tan <i>et al.</i> , 2022 [210]               |
|      | Terui <i>et al.</i> , 2023 [211]             |
|      | Tu <i>et al.</i> , 2022 [162]                |
|      | Van der Linde <i>et al.</i> , 2022 [212]     |
|      | Xu <i>et al.</i> , 2021 [213]                |
|      | Yaylali <i>et al.</i> , 2016 [214]           |
|      | Yersal <i>et al.</i> , 2018 [215]            |
|      | Zhang <i>et al.</i> , 2021 [216]             |
|      | Zhou <i>et al.</i> , 2020 [219]              |
|      | Feng <i>et al.</i> , 2021 [218]              |
|      | Gherghe <i>et al.</i> , 2022 [145]           |

**Table S2. Studies identified for the emerging biomarkers.**

|             |                                                                                                                                                                                                                                                                                                                                                                                                                                                                                                                                                                                                                                                                                                                                                                                                             |                   |                                                                                                                                                                                                                                                                                                                                                                                                                                                                                                                                                                                                                               |
|-------------|-------------------------------------------------------------------------------------------------------------------------------------------------------------------------------------------------------------------------------------------------------------------------------------------------------------------------------------------------------------------------------------------------------------------------------------------------------------------------------------------------------------------------------------------------------------------------------------------------------------------------------------------------------------------------------------------------------------------------------------------------------------------------------------------------------------|-------------------|-------------------------------------------------------------------------------------------------------------------------------------------------------------------------------------------------------------------------------------------------------------------------------------------------------------------------------------------------------------------------------------------------------------------------------------------------------------------------------------------------------------------------------------------------------------------------------------------------------------------------------|
| <b>SNPs</b> | <b>References</b><br>Tan <i>et al.</i> , 2020 [221]<br>Stanton <i>et al.</i> , 2015 [221]<br>Serie <i>et al.</i> , 2017 [226]<br>Roca <i>et al.</i> , 2013 [227]<br>Gómez Peña <i>et al.</i> , 2015 [228]<br>Lemieuz <i>et al.</i> , 2013 [229]<br>Schneider <i>et al.</i> , 2017 [231]<br>Gvaldin <i>et al.</i> , 2021 [233]<br>Li <i>et al.</i> , 2019 [234]<br>Li <i>et al.</i> , 2022 [235]<br>Sawyer <i>et al.</i> , 2016 [236]<br>Nakano <i>et al.</i> , 2019 [223]<br>Nyangwara <i>et al.</i> , 2023 [315]<br>Reinbolt <i>et al.</i> , 2015 [224]<br>Soria-Chacartegui <i>et al.</i> , 2021 [317]<br>Velasco-Ruiz <i>et al.</i> , 2021 [316]<br>Vivenza <i>et al.</i> , 2013 [225]<br>Vulsteke <i>et al.</i> , 2015 [318]<br>Shilov <i>et al.</i> , 2019 [314]<br>Udagawa <i>et al.</i> , 2022 [237] | <b>microRNAs</b>  | <b>References</b><br>Sánchez-Sánchez <i>et al.</i> , 2022 [251]<br>Lakhani <i>et al.</i> , 2021 [95]<br>Zare <i>et al.</i> , 2022 [252]<br>Feng <i>et al.</i> , 2021 [144]<br>Zhang <i>et al.</i> , 2020 [253]<br>Gioffré <i>et al.</i> , 2020 [254]<br>Gupta <i>et al.</i> , 2013 [255]<br>Holmgren <i>et al.</i> , 2016 [256]<br>Liu <i>et al.</i> , 2022 [257]<br>Qin <i>et al.</i> , 2018 [258]<br>Rigaud <i>et al.</i> , 2017 [259]<br>Todorova <i>et al.</i> , 2017 [260]<br>Yadi <i>et al.</i> , 2020 [261]<br>Zhu <i>et al.</i> , 2018 [262]<br>Pillai <i>et al.</i> , 2022 [89]<br>Frères <i>et al.</i> , 2018 [304] |
|             |                                                                                                                                                                                                                                                                                                                                                                                                                                                                                                                                                                                                                                                                                                                                                                                                             |                   |                                                                                                                                                                                                                                                                                                                                                                                                                                                                                                                                                                                                                               |
| <b>MPO</b>  | <b>References</b><br>Lakhani <i>et al.</i> , 2021 [95]<br>Wanderley <i>et al.</i> , 2022 [271]<br>Putt <i>et al.</i> , 2015 [98]<br>Ky <i>et al.</i> , 2014 [105]<br>Todorova <i>et al.</i> , 2020 [163]<br>Gullo <i>et al.</i> , 2019 [93]<br>Balmagambetova <i>et al.</i> , 2022 [303]<br>Demissei <i>et al.</i> , 2020 [130]                                                                                                                                                                                                                                                                                                                                                                                                                                                                             | <b>Galectin-3</b> | <b>References</b><br>Gulati <i>et al.</i> , 2017 [92]<br>Bulten <i>et al.</i> , 2015 [149]<br>Van Boxtel <i>et al.</i> , 2015 [279]<br>Ky <i>et al.</i> , 2014 [105]<br>Wanderley <i>et al.</i> , 2022 [271]<br>Patel <i>et al.</i> , 2021 [136]<br>Putt <i>et al.</i> , 2015 [98]<br>Balmagambetova <i>et al.</i> , 2022 [303]<br>Magalhaes <i>et al.</i> , 2015 [278]                                                                                                                                                                                                                                                       |
|             |                                                                                                                                                                                                                                                                                                                                                                                                                                                                                                                                                                                                                                                                                                                                                                                                             | <b>MMPs</b>       | <b>References</b><br>Grakova <i>et al.</i> , 2022 [284]<br>Kirkham <i>et al.</i> , 2022 [285]                                                                                                                                                                                                                                                                                                                                                                                                                                                                                                                                 |
